# Supplementary material for: ACC/AHA/ASE/ASNC/ASPC/HFSA/HRS/SCAI/SCCT/SCMR/STS 2023 Multimodality Appropriate Use Criteria for the Detection and Risk Assessment of Chronic Coronary Disease
Source: Springer Nature journal article supplement (doi:10.1186/s12968-023-00958-5), 2023-02-01
Supplement: MOESM2 [file 26202184]

**2023 ACC/AHA/ASE/ASNC/ASPC/HFSA/HRS/SCAI/SCCT/SCMR/STS Multimodality Appropriate Use Criteria for the Detection and Risk Assessment of Chronic Coronary Disease: Members of the Writing Group, Rating Panel, External Reviewers, and Solution Set Oversight Committee—Relationships with Industry and Other Entities (Comprehensive)**

**Relationships With Industry (RWI) And Other Entities**

The ACC and its partnering organizations rigorously avoid any actual, perceived, or potential conflicts of interest that might arise as a result of an outside relationship or personal interest of a member of the rating panel. Specifically, panelists are asked to provide disclosure statements of all relationships that might be perceived as real or potential conflicts of interest. These statements were discussed with all members of the rating panel at the virtual rating panel meeting and updated and reviewed as necessary. The following is a full list of disclosures by all participants, including relationships not pertinent to this document.

| Participant                          | Employment                                                                                                                     | Representing | Consultant                                           | Speakers Bureau | Ownership/<br>Partnership/<br>Principal | Personal<br>Research         | Institutional,<br>Organizational,<br>or Other<br>Financial Benefit | Expert<br>Witness |
|--------------------------------------|--------------------------------------------------------------------------------------------------------------------------------|--------------|------------------------------------------------------|-----------------|-----------------------------------------|------------------------------|--------------------------------------------------------------------|-------------------|
| <b>Writing Group</b>                 |                                                                                                                                |              |                                                      |                 |                                         |                              |                                                                    |                   |
| David E. Winchester, <i>Co-Chair</i> | University of Florida, Division of Cardiology—Professor of Medicine and Radiology                                              | ACC          | None                                                 | None            | None                                    | None                         | None                                                               | None              |
| David J. Maron, <i>Co-Chair</i>      | Stanford University School of Medicine—Professor of Medicine, Cardiovascular, Director, Preventive Cardiology                  | ACC          | None                                                 | None            | None                                    | • NIH/NHLBI (ISCHEMIA)       | • Ablative Solutions*<br>• Medscape (Member, Advisory Group)       | None              |
| Ron Blankstein                       | Brigham and Women’s Hospital—Associate Director, Cardiovascular Imaging Program, Professor of Medicine, Harvard Medical School | SCCT         | • Amgen, Inc<br>• Caristo Diagnostics<br>• Novartis† | None            | None                                    | • Amgen, Inc*<br>• Novartis• | • SCCT, (Officer)                                                  | None              |
| Ian C. Chang                         | Mayo Clinic—Assistant Professor of Medicine,                                                                                   | ACC          | None                                                 | None            | None                                    | None                         | None                                                               | None              |

| <b>Participant</b>   | <b>Employment</b>                                                                                                    | <b>Representing</b> | <b>Consultant</b>                                                                  | <b>Speakers Bureau</b> | <b>Ownership/<br/>Partnership/<br/>Principal</b> | <b>Personal<br/>Research</b>                                                                                                                                                                                                                                                                                                | <b>Institutional,<br/>Organizational,<br/>or Other<br/>Financial Benefit</b>          | <b>Expert<br/>Witness</b> |
|----------------------|----------------------------------------------------------------------------------------------------------------------|---------------------|------------------------------------------------------------------------------------|------------------------|--------------------------------------------------|-----------------------------------------------------------------------------------------------------------------------------------------------------------------------------------------------------------------------------------------------------------------------------------------------------------------------------|---------------------------------------------------------------------------------------|---------------------------|
|                      | and Georgetown University—Assistant Professor of Medicine                                                            |                     |                                                                                    |                        |                                                  |                                                                                                                                                                                                                                                                                                                             |                                                                                       |                           |
| Ajay J. Kirtane      | Columbia University Medical Center— Professor of Medicine, Chief Academic Office, Director NYP/Columbia Cardiac Cath | SCAI                | <ul style="list-style-type: none"> <li>• IMDS</li> </ul>                           | None                   | None                                             | <ul style="list-style-type: none"> <li>• Abbott Vascular†</li> <li>• Amgen, Inc†</li> <li>• Boston Scientific†</li> <li>• Cardiovascular Systems, Inc†</li> <li>• CSI†</li> <li>• Medtronic†</li> <li>• Opsens</li> <li>• Philips/ Spectranetics†</li> <li>• ReCor Medical†</li> <li>• Regeneron</li> <li>• Zoll</li> </ul> | None                                                                                  | None                      |
| Raymond Y. Kwong     | Brigham and Women’s Hospital—Director of Cardiac Magnetic Resonance Imaging                                          | SCMR                | None                                                                               | None                   | None                                             | <ul style="list-style-type: none"> <li>• Alnylam, Inc†</li> <li>• MyoKardia, Inc. †</li> </ul>                                                                                                                                                                                                                              | <ul style="list-style-type: none"> <li>• SCMR, (Officer)*</li> </ul>                  | None                      |
| Patricia A. Pellikka | Mayo Clinic College of Medicine—Professor of Medicine                                                                | ASE                 | <ul style="list-style-type: none"> <li>• Ultromics</li> <li>• UpToDate†</li> </ul> | None                   | None                                             | <ul style="list-style-type: none"> <li>• Bracco*</li> <li>• Edwards Lifesciences</li> <li>• GE Healthcare*</li> <li>• Lantheus Medical Imaging*</li> <li>• OxThera*</li> <li>• Ultromics</li> </ul>                                                                                                                         | <ul style="list-style-type: none"> <li>• ASE Foundation*</li> <li>• NHLBI*</li> </ul> | None                      |
| Jordan M. Prutkin    | Washington Medical                                                                                                   | HRS                 | None                                                                               | None                   | None                                             | None                                                                                                                                                                                                                                                                                                                        | <ul style="list-style-type: none"> <li>• UpToDate†</li> </ul>                         | None                      |

| <b>Participant</b>     | <b>Employment</b>                                                                                                      | <b>Representing</b> | <b>Consultant</b>                                                            | <b>Speakers Bureau</b>                                               | <b>Ownership/<br/>Partnership/<br/>Principal</b>                                              | <b>Personal<br/>Research</b>                                               | <b>Institutional,<br/>Organizational,<br/>or Other<br/>Financial Benefit</b>                            | <b>Expert<br/>Witness</b> |
|------------------------|------------------------------------------------------------------------------------------------------------------------|---------------------|------------------------------------------------------------------------------|----------------------------------------------------------------------|-----------------------------------------------------------------------------------------------|----------------------------------------------------------------------------|---------------------------------------------------------------------------------------------------------|---------------------------|
|                        | University—Professor of Medicine                                                                                       |                     |                                                                              |                                                                      |                                                                                               |                                                                            |                                                                                                         |                           |
| Raymond Russell        | Alpert Medical School of Brown University—Professor of Medicine                                                        | ASNC                | None                                                                         | None                                                                 | <ul style="list-style-type: none"> <li>• Dicerna†</li> <li>• Terns Pharmaceutical†</li> </ul> | None                                                                       | <ul style="list-style-type: none"> <li>• Dicerna†</li> <li>• Terns Pharmaceutical (Officer)†</li> </ul> | None                      |
| Alexander T. S. Sandhu | Stanford University School of Medicine—Instructor of Medicine                                                          | ACC                 | None                                                                         | None                                                                 | None                                                                                          | None                                                                       | None                                                                                                    | None                      |
| <b>Rating Panel</b>    |                                                                                                                        |                     |                                                                              |                                                                      |                                                                                               |                                                                            |                                                                                                         |                           |
| W. Patricia Bandettini | National Institutes of Health—Medical Officer, Heart Failure & Arrhythmias Branch                                      | SCMR                | None                                                                         | None                                                                 | None                                                                                          | None                                                                       | None                                                                                                    | None                      |
| Dennis A. Calnon       | Ohio Health Heart and Vascular Physicians—Riverside Methodist Hospital, Cardiac Imaging, Director                      | ASNC                | None                                                                         | None                                                                 | None                                                                                          | None                                                                       | <ul style="list-style-type: none"> <li>• ASNC, (Officer)</li> </ul>                                     | None                      |
| Manuel D. Cerqueira    | Cleveland Clinic Foundation—Chairman, Department of Molecular and Functional Imaging                                   | ACC Imaging Council | <ul style="list-style-type: none"> <li>• Astellas Pharma†</li> </ul>         | <ul style="list-style-type: none"> <li>• Astellas Pharma†</li> </ul> | None                                                                                          | None                                                                       | None                                                                                                    | None                      |
| Larry S. Dean          | Medicine Regional Heart Center University of Washington School of Medicine—Professor of Medicine and Surgery, Director | ACC                 | <ul style="list-style-type: none"> <li>• ABIM</li> <li>• Teleflex</li> </ul> | None                                                                 | <ul style="list-style-type: none"> <li>• Emageon</li> </ul>                                   | <ul style="list-style-type: none"> <li>• Edwards Life Sciences†</li> </ul> | <ul style="list-style-type: none"> <li>• University of Washington Medicine (Member) †</li> </ul>        | None                      |

| <b>Participant</b> | <b>Employment</b>                                                                                                     | <b>Representing</b> | <b>Consultant</b>                                                                                                             | <b>Speakers Bureau</b> | <b>Ownership/<br/>Partnership/<br/>Principal</b> | <b>Personal<br/>Research</b> | <b>Institutional,<br/>Organizational,<br/>or Other<br/>Financial Benefit</b>                                                                                                                                                                                                                                                                                                                                                                   | <b>Expert<br/>Witness</b> |
|--------------------|-----------------------------------------------------------------------------------------------------------------------|---------------------|-------------------------------------------------------------------------------------------------------------------------------|------------------------|--------------------------------------------------|------------------------------|------------------------------------------------------------------------------------------------------------------------------------------------------------------------------------------------------------------------------------------------------------------------------------------------------------------------------------------------------------------------------------------------------------------------------------------------|---------------------------|
| Milind Y. Desai    | Cleveland Clinic Foundation, Heart and Vascular Institute—<br>Professor of Medicine                                   | ACC                 | <ul style="list-style-type: none"> <li>• Bristol Myers Squibb†</li> <li>• Caristo Diagnostics</li> <li>• Medtronic</li> </ul> | None                   | None                                             | None                         | None                                                                                                                                                                                                                                                                                                                                                                                                                                           | None                      |
| Howard J. Eisen    | Pennsylvania State Heart and Vascular Institute—Medical Director, Advanced Heart Failure, Cardiac Transplant Programs | ACC                 | None                                                                                                                          | None                   | None                                             | None                         | None                                                                                                                                                                                                                                                                                                                                                                                                                                           | None                      |
| Stephen E. Frenes  | Sunnybrook Health Sciences Centre, Division of Cardiac and Vascular Surgery—<br>Professor, Department of Surgery      | ACC                 | None                                                                                                                          | None                   | None                                             | None                         | <ul style="list-style-type: none"> <li>• Bayer (COMPASS)‡</li> <li>• Bayer (Galileo)‡</li> <li>• Boston Scientific (NeoAcurate II Study) ‡</li> <li>• Edwards (The Multidisciplinary, Multimodality but Minimalist (3M) Approach to Transfemoral Transcatheter Aortic Valve Replacement)‡</li> <li>• HLT, Inc (Radiant study)‡</li> <li>• Medtronic (Medtronic TAVR Low Risk)‡</li> <li>• Medtronic (SURTAVI)‡</li> <li>• Medtronic</li> </ul> | None                      |

| <b>Participant</b>     | <b>Employment</b>                                                                                                                                  | <b>Representing</b> | <b>Consultant</b>                                                    | <b>Speakers Bureau</b> | <b>Ownership/<br/>Partnership/<br/>Principal</b> | <b>Personal<br/>Research</b>                                     | <b>Institutional,<br/>Organizational,<br/>or Other<br/>Financial Benefit</b>          | <b>Expert<br/>Witness</b> |
|------------------------|----------------------------------------------------------------------------------------------------------------------------------------------------|---------------------|----------------------------------------------------------------------|------------------------|--------------------------------------------------|------------------------------------------------------------------|---------------------------------------------------------------------------------------|---------------------------|
|                        |                                                                                                                                                    |                     |                                                                      |                        |                                                  |                                                                  | (Evolut-R<br>FORWARD)‡<br>• Bernard<br>Goldman Chair in<br>Cardiovascular<br>Surgery† |                           |
| Mario F. L.<br>Gaudino | Weill Cornell Medical<br>College—Stephen and<br>Suzanne Weiss<br>Professor in<br>Cardiothoracic Surgery,<br>Professor of<br>Cardiothoracic Surgery | STS                 | None                                                                 | None                   | None                                             | • Canadian<br>Institutes of<br>Health and<br>Research*<br>• NIH* | None                                                                                  | None                      |
| Linda D. Gillam        | Morristown Medical<br>Center, Department of<br>Cardiovascular<br>Medicine—Chair                                                                    | ASE                 | • Edwards<br>Lifesciences†<br>• Egnite<br>• Medtronic†<br>• Philips† | None                   | None                                             | • Edwards<br>Lifesciences†<br>• Medtronic†                       | • Circulation<br>Imaging (Officer)                                                    | None                      |
| Nicole L. Lohr         | Medical College of<br>Wisconsin,<br>Cardiovascular<br>Medicine—Professor of<br>Medicine                                                            | AHA                 | None                                                                 | None                   | None                                             | • Amgen<br>(Galactic, Heart<br>Failure)‡                         | None                                                                                  | None                      |
| Joseph E. Marine       | Johns Hopkins<br>University School of<br>Medicine,<br>Cardiovascular<br>Medicine—Professor of<br>Medicine                                          | HRS                 | None                                                                 | None                   | None                                             | None                                                             | None                                                                                  | None                      |
| Khurram Nasir          | Houston Methodist<br>DeBakey Cardiology<br>Associates, Preventive<br>Cardiology—Professor<br>of Cardiology                                         | ASPC                | • Amgen, Inc†<br>• Esperion<br>• Novartis<br>• Novo Nordisk†         | • Amgen, Inc.          | None                                             | None                                                             | None                                                                                  | None                      |

| <b>Participant</b>          | <b>Employment</b>                                                                                                                                                        | <b>Representing</b>        | <b>Consultant</b>                                                                                                                                                              | <b>Speakers Bureau</b> | <b>Ownership/<br/>Partnership/<br/>Principal</b> | <b>Personal<br/>Research</b>                                                                           | <b>Institutional,<br/>Organizational,<br/>or Other<br/>Financial Benefit</b>                              | <b>Expert<br/>Witness</b> |
|-----------------------------|--------------------------------------------------------------------------------------------------------------------------------------------------------------------------|----------------------------|--------------------------------------------------------------------------------------------------------------------------------------------------------------------------------|------------------------|--------------------------------------------------|--------------------------------------------------------------------------------------------------------|-----------------------------------------------------------------------------------------------------------|---------------------------|
| Leslee J. Shaw              | Icahn School of Medicine at Mount Sinai Hospital Mount Sinai—Director, Blavatnik Family Women’s Health Research Institute, Professor of Medicine                         | SCCT                       | None                                                                                                                                                                           | None                   | None                                             | None                                                                                                   | None                                                                                                      | None                      |
| Jacqueline E. Tamis-Holland | Icahn School of Medicine at Mount Sinai Hospital Mount Sinai—Director, Women’s Heart NY, Assistant Professor of Medicine, Director, Interventional Cardiology Fellowship | SCAI                       | <ul style="list-style-type: none"> <li>• EBIX</li> <li>• Gaffney Events Educational Trust</li> </ul>                                                                           | None                   | None                                             | None                                                                                                   | <ul style="list-style-type: none"> <li>• AHA (Committee Member)*</li> <li>• Pfizer Inc.</li> </ul>        | None                      |
| L. Samuel Wann              | Cardiovascular Disease Consultant                                                                                                                                        | ACC                        | None                                                                                                                                                                           | None                   | None                                             | None                                                                                                   | None                                                                                                      | None                      |
| John B. Wong                | Tufts University School of Medicine—Professor of Medicine                                                                                                                | ACC                        | <ul style="list-style-type: none"> <li>• Informed Medical Decisions Foundation: Healthwise</li> <li>• Annals of Internal Medicine (American College of Physicians)†</li> </ul> | None                   | None                                             | <ul style="list-style-type: none"> <li>• Patient-Centered Outcomes Research Institute (PI)†</li> </ul> | <ul style="list-style-type: none"> <li>• United States Preventive Services Task Force (Member)</li> </ul> | None                      |
| <b>Reviewers</b>            |                                                                                                                                                                          |                            |                                                                                                                                                                                |                        |                                                  |                                                                                                        |                                                                                                           |                           |
| Niti R. Aggarwal            | Mayo Clinic— Assistant Professor of Medicine                                                                                                                             | Lead SSOC Reviewer         | None                                                                                                                                                                           | None                   | None                                             | None                                                                                                   | None                                                                                                      | None                      |
| Daniel S. Berman            | Cedars-Sinai Medical Center, Department of Imaging—Director,                                                                                                             | ACC Imaging Council & SCCT | <ul style="list-style-type: none"> <li>• Cedars Sinai Medical Center – Software</li> </ul>                                                                                     | None                   | None                                             | None                                                                                                   | None                                                                                                      | None                      |

| <b>Participant</b> | <b>Employment</b>                                                                                                              | <b>Representing</b> | <b>Consultant</b>                     | <b>Speakers Bureau</b>                                                                                                              | <b>Ownership/<br/>Partnership/<br/>Principal</b> | <b>Personal<br/>Research</b>                                                                                          | <b>Institutional,<br/>Organizational,<br/>or Other<br/>Financial Benefit</b>                             | <b>Expert<br/>Witness</b> |
|--------------------|--------------------------------------------------------------------------------------------------------------------------------|---------------------|---------------------------------------|-------------------------------------------------------------------------------------------------------------------------------------|--------------------------------------------------|-----------------------------------------------------------------------------------------------------------------------|----------------------------------------------------------------------------------------------------------|---------------------------|
|                    | Cardiac Imaging                                                                                                                |                     | Royalties†<br>• General<br>Electronic |                                                                                                                                     |                                                  |                                                                                                                       |                                                                                                          |                           |
| Matthew J. Budoff  | Los Angeles Biomedical<br>Research Institute—<br>Program Director,<br>Division of Cardiology                                   | SCCT                | • Esperion†                           | • Amarin†<br>• Amgen, Inc†<br>• AstraZeneca<br>Pharmaceuticals†<br>• Boehringer<br>Ingelheim<br>Pharmaceuticals†<br>• Novo Nordisk† | None                                             | None                                                                                                                  | None                                                                                                     | None                      |
| Andrew J. Einstein | Columbia University<br>Irving Medical Center,<br>Department of<br>Medicine—<br>Associate Professor of<br>Medicine in Radiology | ASNC                | • Actinia                             | None                                                                                                                                | None                                             | • Canon Medical<br>Systems†<br>• GE<br>Healthcare†<br>• Roche Medical<br>Systems†<br>• W. L. Gore†<br>• Novo Nordisk† | • ASNC (Officer)*<br>• JACC Imaging<br>(Officer)*<br>• Journal of<br>Nuclear<br>Cardiology<br>(Officer)* | None                      |
| Victor A. Ferrari  | Hospital of the<br>University of<br>Pennsylvania—<br>Professor of Medicine;<br>Associate Director,<br>Cardiovascular Imaging   | SCMR                | None                                  | None                                                                                                                                | None                                             | None                                                                                                                  | • Journal of<br>Cardiovascular<br>Magnetic<br>Resonance<br>(Officer)*                                    | None                      |
| Theodore J. Kolas  | University of Michigan<br>Cardiovascular<br>Center—Associate<br>Professor of Medicine                                          | ASE                 | None                                  | None                                                                                                                                | None                                             | None                                                                                                                  | None                                                                                                     | None                      |
| Jonathon Leipsic   | University of British<br>Columbia, Department<br>of Radiology—<br>Professor of Radiology<br>and Cardiology                     | SCCT                | • CIRCL†<br>• MVRX†                   | • GE Healthcare<br>• Philips                                                                                                        | • CIRCL CVI†<br>• Heartflow†                     | • Heartflow Inc†                                                                                                      | • Abbott<br>• Boston<br>Scientific<br>• Edwards<br>• Medtronic                                           | None                      |

| Participant                                                                                                                                                                                                                                                                                                    | Employment                                                                                                   | Representing | Consultant                  | Speakers Bureau                                | Ownership/<br>Partnership/<br>Principal | Personal<br>Research                              | Institutional,<br>Organizational,<br>or Other<br>Financial Benefit | Expert<br>Witness |
|----------------------------------------------------------------------------------------------------------------------------------------------------------------------------------------------------------------------------------------------------------------------------------------------------------------|--------------------------------------------------------------------------------------------------------------|--------------|-----------------------------|------------------------------------------------|-----------------------------------------|---------------------------------------------------|--------------------------------------------------------------------|-------------------|
| Brian Olshansky                                                                                                                                                                                                                                                                                                | University of Iowa<br>Carver College, Division<br>of Electrophysiology—<br>Emeritus Professor of<br>Medicine | HRS          | None                        | None                                           | None                                    | None                                              | • Astra Zeneca<br>(DSMB)                                           | None              |
| Harmony R.<br>Reynolds                                                                                                                                                                                                                                                                                         | NYU Grossman School<br>of Medicine,<br>Department of<br>Medicine—Associate<br>Professor of Medicine          | AHA          | None                        | None                                           | None                                    | • Abbott<br>Vascular*<br>• Philips*<br>• Siemens* | None                                                               | None              |
| Peter P. Toth                                                                                                                                                                                                                                                                                                  | University of Illinois<br>College of Medicine,<br>Division of<br>Cardiology—Adjunct<br>Professor of Medicine | ASPC         | • Amarin<br>• Kowa†         | • Amgen, Inc†<br>• Esperion<br>• Novo-Nordisk† | None                                    | None                                              | None                                                               | None              |
| Howard S.<br>Weintraub                                                                                                                                                                                                                                                                                         | NYU Grossman School<br>of Medicine,<br>Department of<br>Medicine—Clinical<br>Professor of Medicine           | ASPC         | • Amgen, Inc.<br>• Novartis | None                                           | None                                    | • Akcea†<br>• Amarin<br>• Amgen, Inc†             | None                                                               | None              |
| David H. Wiener                                                                                                                                                                                                                                                                                                | Jefferson Medical<br>College, Jefferson<br>Heart Institute—<br>Professor of Medicine                         | ASE          | None                        | None                                           | None                                    | None                                              | None                                                               | None              |
| <b>Solution Set Oversight Committee</b>                                                                                                                                                                                                                                                                        |                                                                                                              |              |                             |                                                |                                         |                                                   |                                                                    |                   |
| RWI and disclosure statements for members of the SSOC can be found here: <a href="https://www.acc.org/guidelines/about-guidelines-and-clinical-documents/guidelines-and-documents-task-forces">https://www.acc.org/guidelines/about-guidelines-and-clinical-documents/guidelines-and-documents-task-forces</a> |                                                                                                              |              |                             |                                                |                                         |                                                   |                                                                    |                   |

This table represents *comprehensive* relationships of participants with industry and other entities that were reported at the time this document was under development. The table does not necessarily reflect relationships with industry at the time of publication.



A person is deemed to have a *significant* interest in a business if the interest represents ownership of  $\geq 5\%$  of the voting stock or share of the business entity, or ownership of  $\geq \$5,000$  of the fair market value of the business entity; or if funds received by the person from the business entity exceed 5% of the person's gross income for the previous year. Relationships in this table with no symbol are considered *modest* (less than significant under the preceding definition). Relationships that exist with *no financial benefit* are also included for the purpose of transparency. Please refer to <http://www.acc.org/guidelines/about-guidelines-and-clinical-documents/relationships-with-industry-policy> for definitions of disclosure categories or additional information about the ACC Disclosure Policy for Writing Committees.

- \* No financial benefit
- † Significant relationship
- ‡ Clinical Trial Enroller

ACC = American College of Cardiology; AHA = American Heart Association; ASE = American Society of Echocardiography; ASNC = American Society of Nuclear Cardiology; ASPC = American Society of Preventive Cardiology; AUC = Appropriate Use Criteria; DSMB = Data Safety Monitoring Board; HRS = Heart Rhythm Society; NIH = National Institutes of Health; NHLBI = National Heart, Lung, and Blood Institute; SCAI = Society for Cardiovascular Angiography and Interventions; SCCT = Society of Cardiovascular Computed Tomography; SCMR = Society for Cardiovascular Magnetic Resonance; SSOC = Solution Set Oversight Committee.
